# Supplementary material
Source: Royal Society of Chemistry journal article supplement (doi:10.1039/d6lc00110f)
Supplement: d6lc00110f2.pdf [file d6lc00110f2.pdf]

Supporting information

## **Stretchable Mesoporous Electrodes as a Versatile Platform for Minimally Invasive Surgical Devices**

*Michael Abraham Listyawan<sup>1</sup>, Chi Cong Nguyen<sup>1</sup>, Tran Bach Dang<sup>1</sup>, Nhat Mihn Doan<sup>1</sup>, Quang Ahn Nguyen<sup>1</sup>, Yulin Qiu<sup>1,2</sup>, Eva Tomaskovic-Crook<sup>4,5,6</sup>, Mostafa Kamal Masud<sup>3</sup>, Yusuke Yamauchi<sup>3</sup>, Jeremy Micah Crook<sup>4,5,6</sup>, Mohit Naresh Shivdasani<sup>2</sup>, Thanh Nho Do<sup>2,7</sup>, Hoang-Phuong Phan<sup>1,7\*</sup>*

*<sup>1</sup>School of Mechanical and Manufacturing Engineering, The University of New South Wales, Sydney, NSW 2052, Australia*

*<sup>2</sup>Graduate School of Biomedical Engineering, The University of New South Wales, Sydney, NSW 2052, Australia*

*<sup>3</sup>Australian Institute of Bioengineering and Nanotechnology (AIBN) and School of Chemical Engineering, The University of Queensland, St Lucia, QLD 4072, Australia*

*<sup>4</sup>Arto Hardy Family Biomedical Innovation Hub, Chris O'Brien Lifecare, Camperdown, NSW, 2050 Australia*

*<sup>5</sup>School of Medical Sciences, Faculty of Medicine and Health, The University of Sydney, Camperdown, NSW, 2006 Australia*

*<sup>6</sup>Intelligent Polymer Research Institute, Innovation Campus, University of Wollongong, Squires Way, Fairy Meadow, NSW, 2519 Australia*

*<sup>7</sup>Tyree Foundation Institute of Health Engineering, University of New South Wales, Sydney, NSW 2052, Australia*

Email: [hp.phan@unsw.edu.au](mailto:hp.phan@unsw.edu.au)

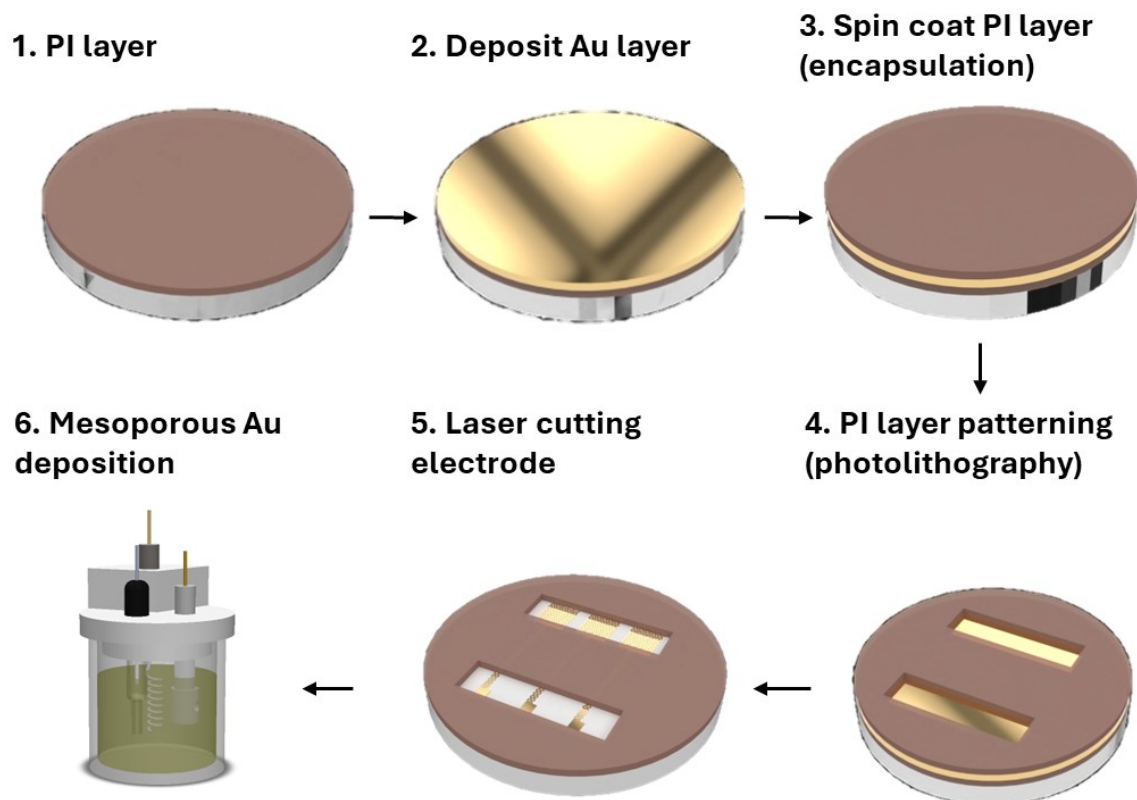

**Figure S1** Fabrication steps of the flexible mesoporous gold electrode

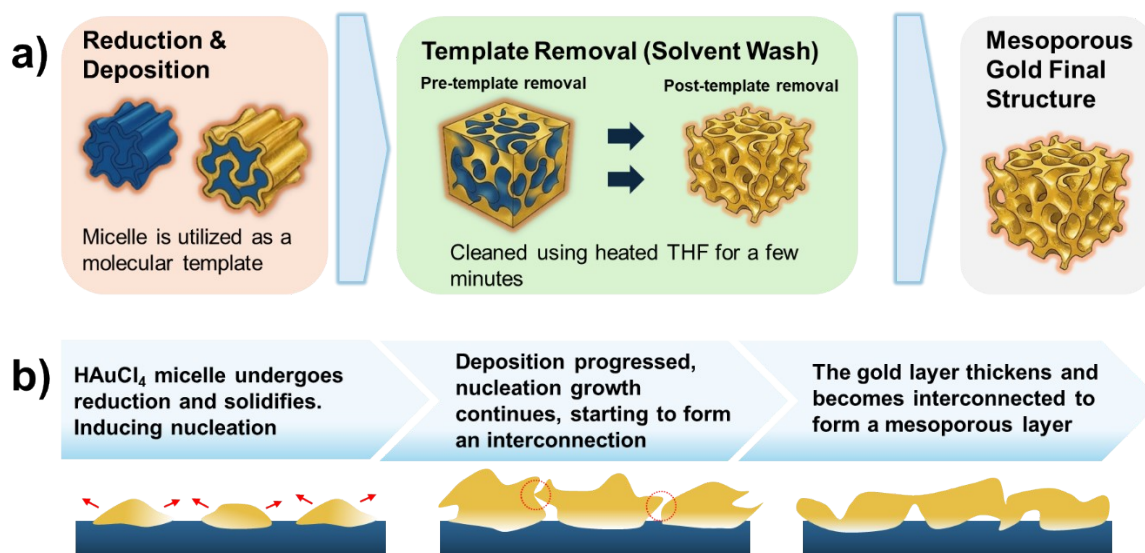

**Figure S2** Schematic of mesoporous gold overall process and growth mechanisms. (a) The overall process that occurs on the mesoporous gold layer during deposition and post-deposition. (b) The growth mechanisms of the mesoporous gold layer during deposition.

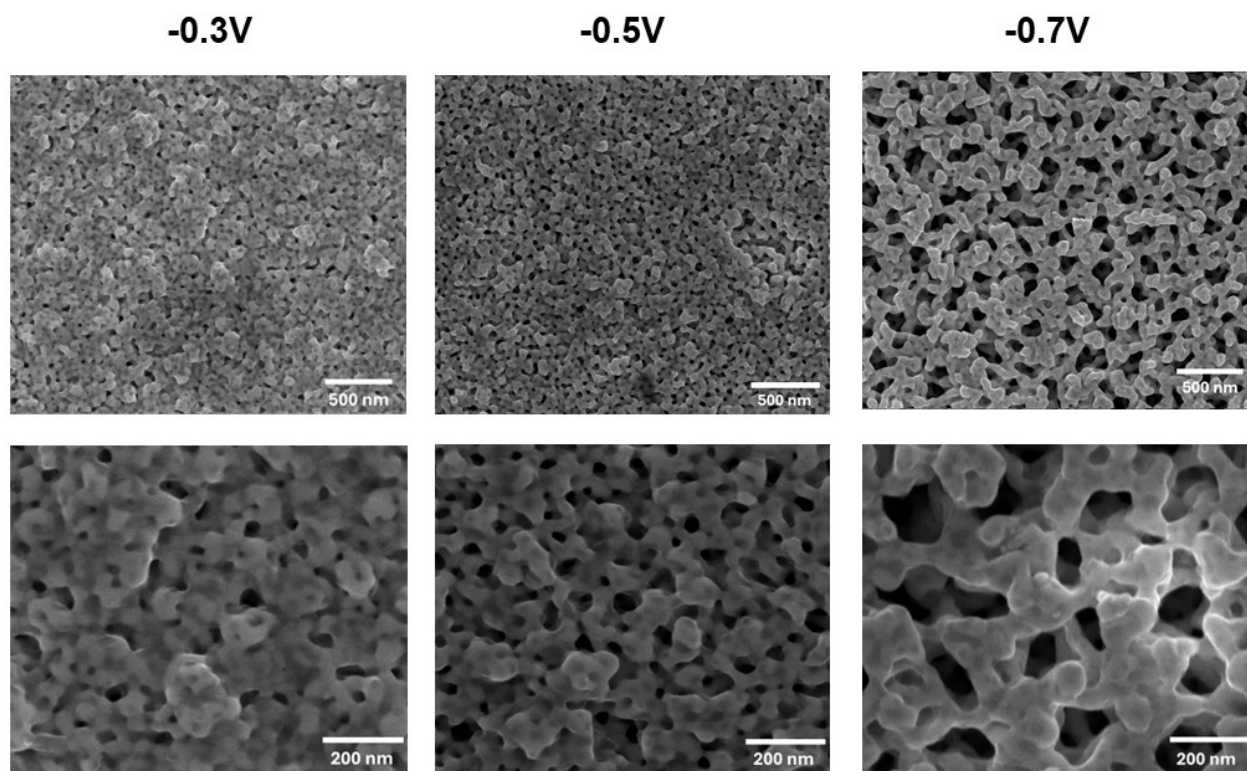

**Figure S3** SEM micrographs of mesoporous gold under various voltages applied

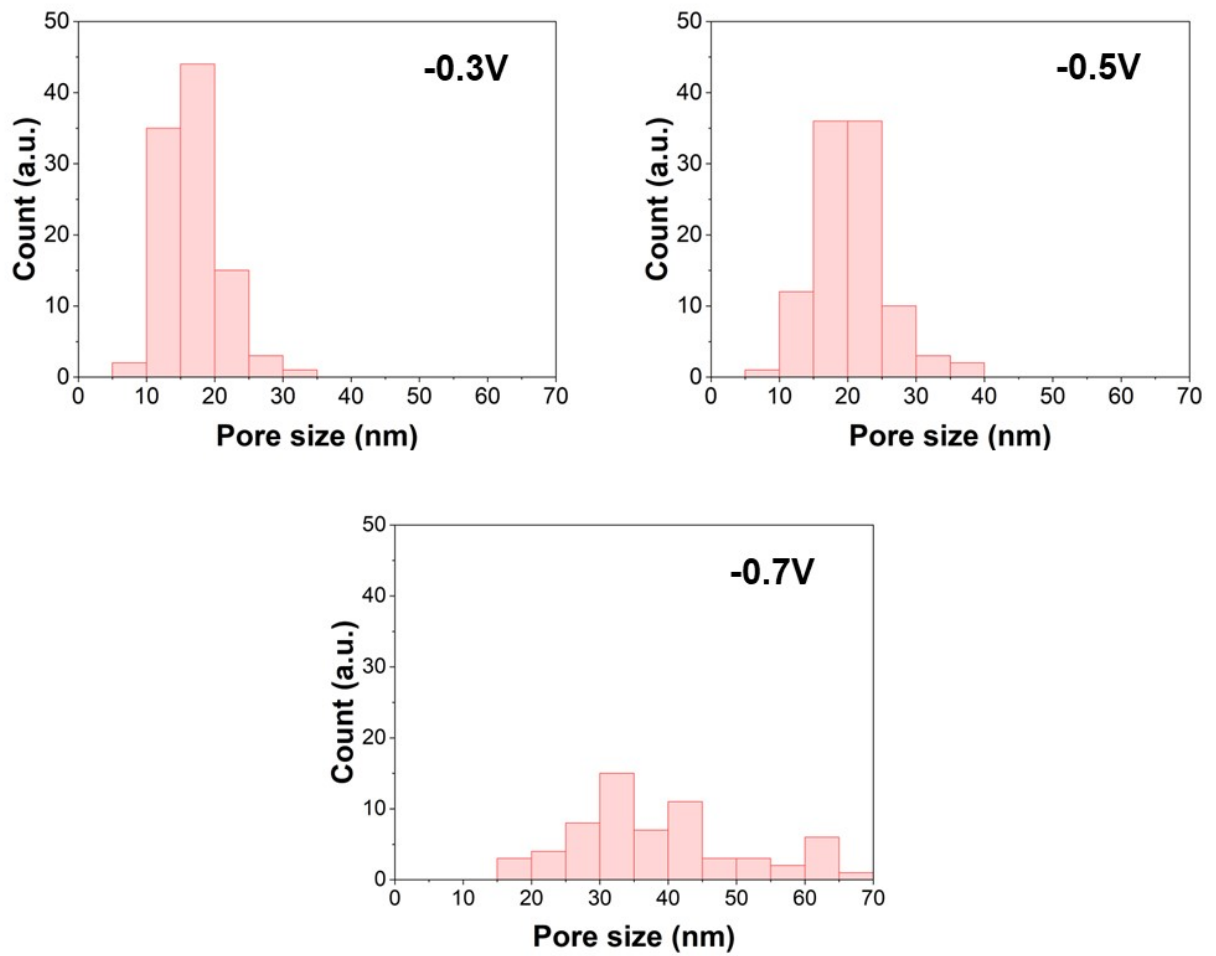

**Figure S4** Pore size distribution of mesoporous gold under different voltages applied during deposition.

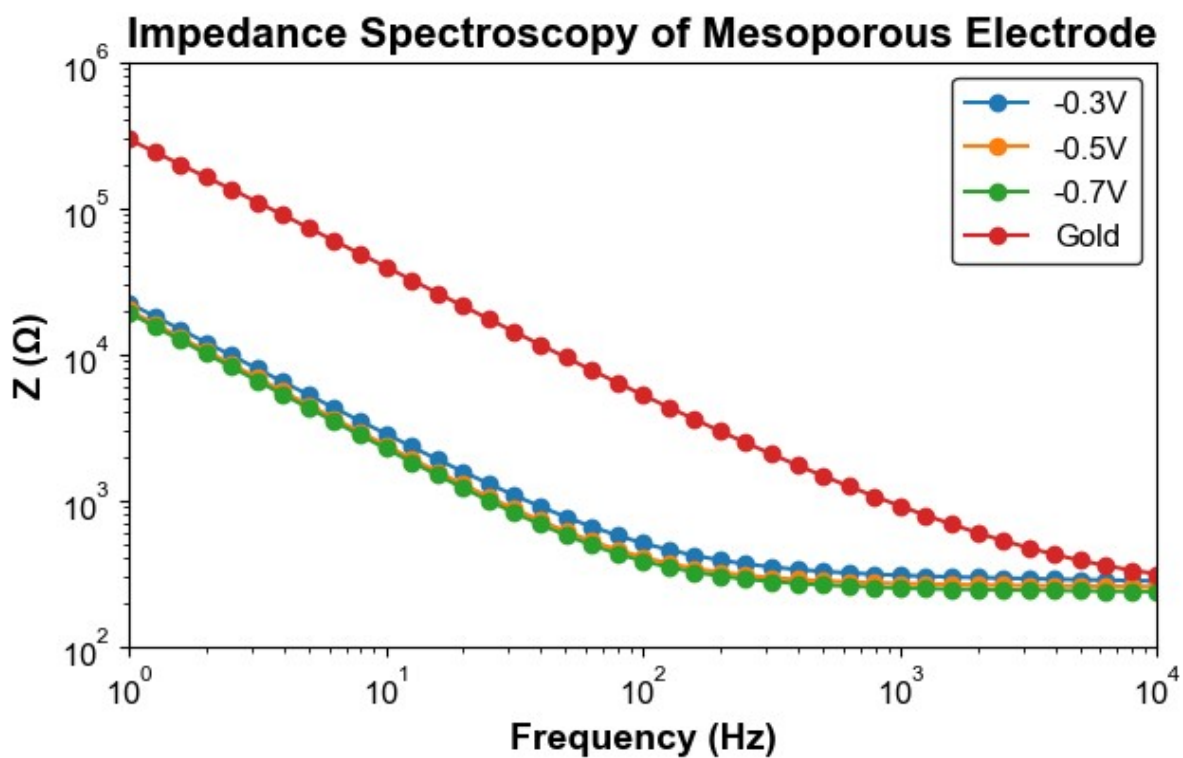

**Figure S5** Electrochemical impedance spectroscopy (EIS) of mesoporous gold under various voltages applied during mesoporous gold layer deposition (-0.3V, -0.5V, -0.7V).

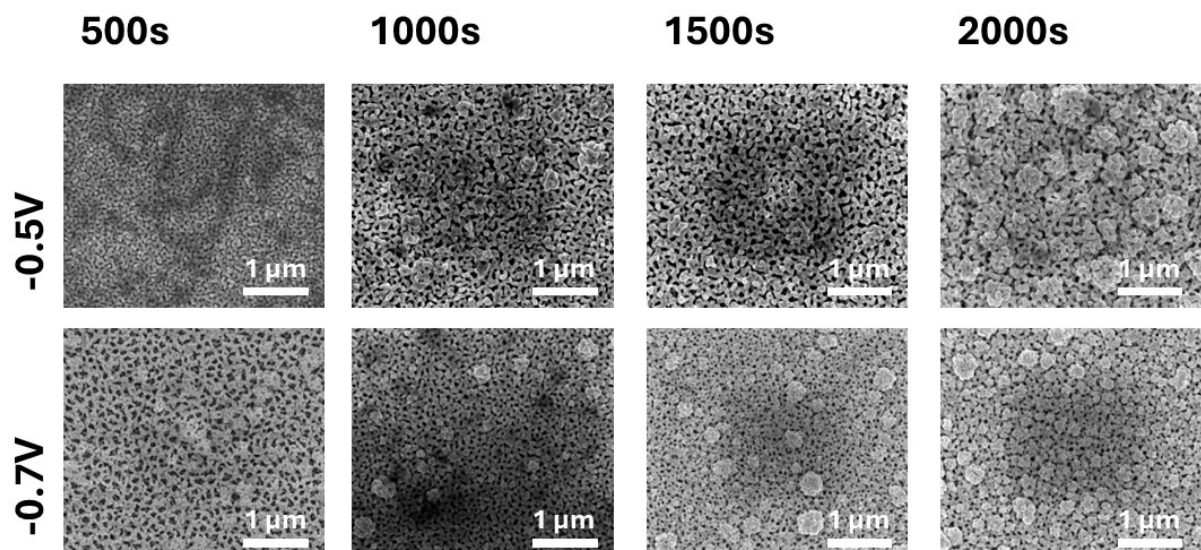

**Figure S6** SEM micrographs of mesoporous gold under different voltages and deposition durations

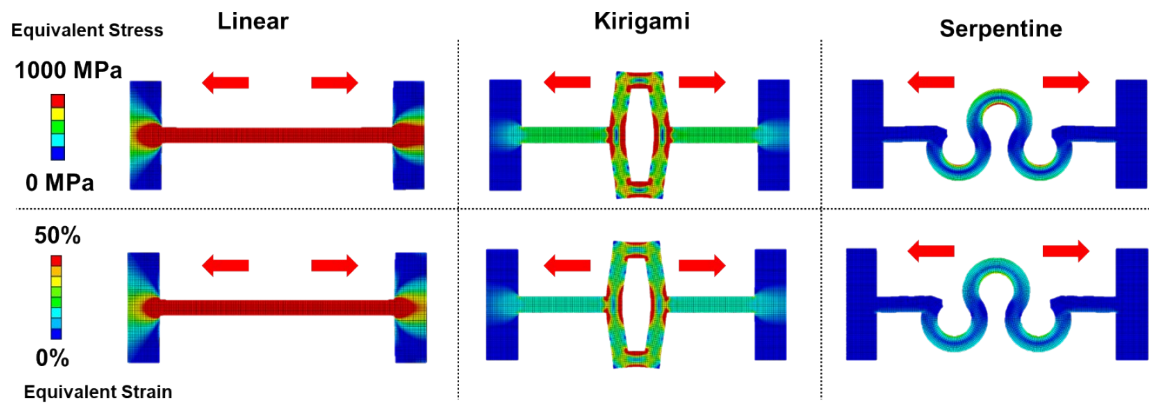

**Figure S7** FEA simulation comparison of linear, kirigami, and serpentine structures with the gage length of 1.4 mm and applied displacement of 1.4 mm.

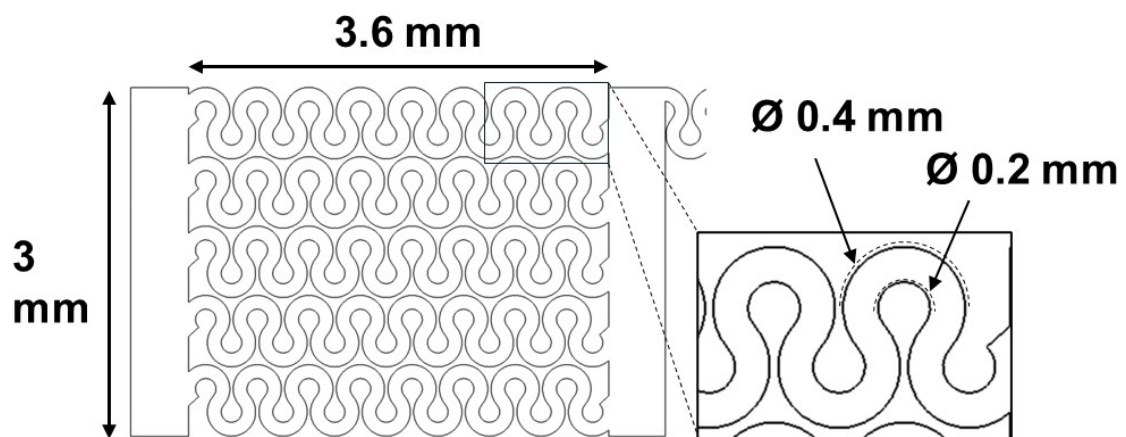

**Figure S8** Flexible serpentine electrode dimensions with serpentine inner and outer diameter.

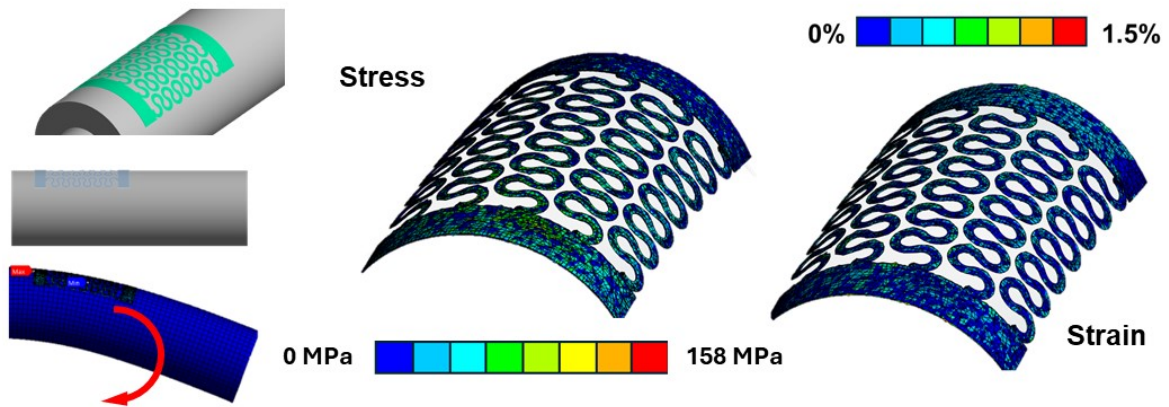

**Figure S9** FEA simulation when the model is applied with a bending motion. The bending motion is visualized, and its stress and strain distribution map.

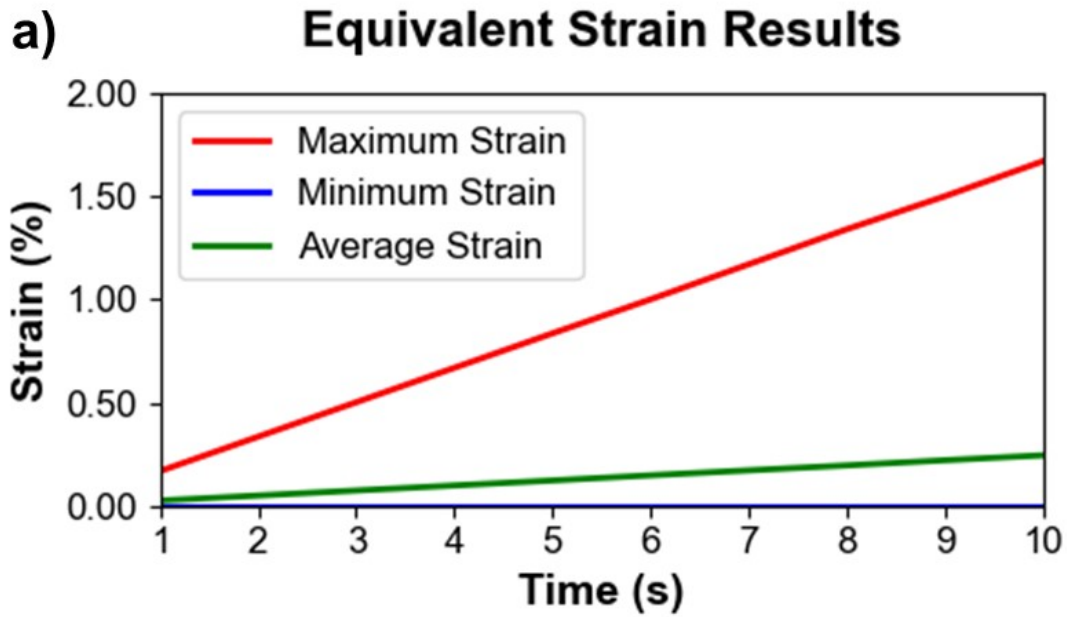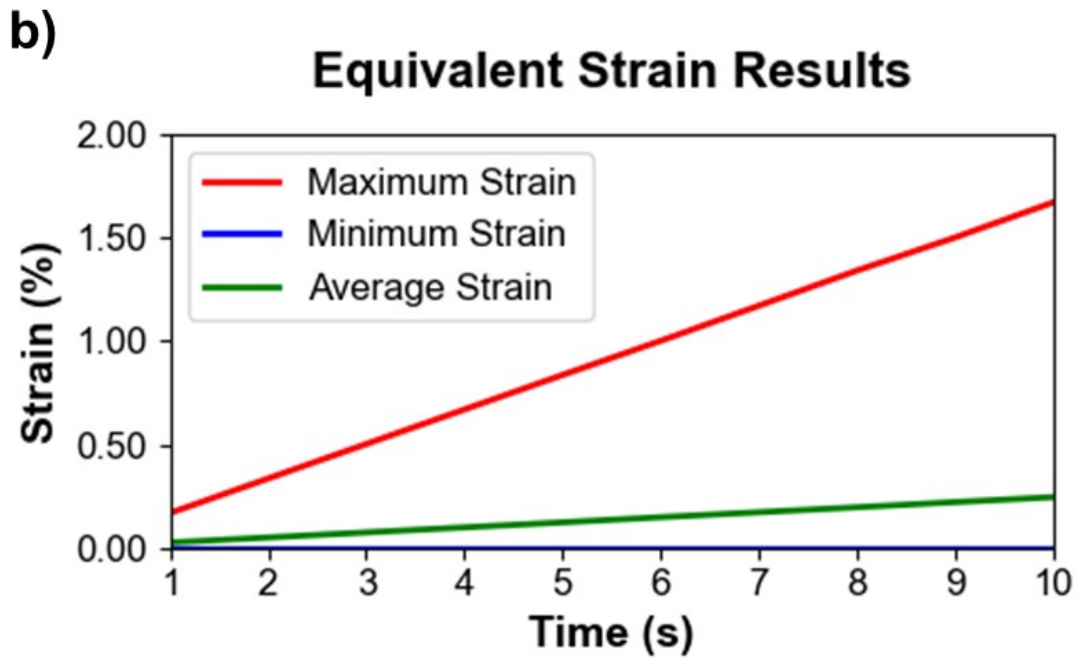

**Figure S10** Stress and Strain results from FEA simulations when applied with a bending moment for 10 split substeps, showing the maximum, minimum, and average value of each substep.

$\varnothing < 2.8 \text{ mm}$

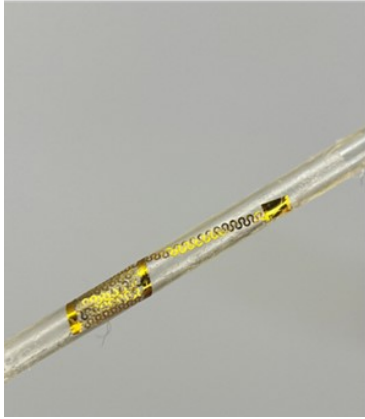

$\varnothing = 2.8 \text{ mm}$

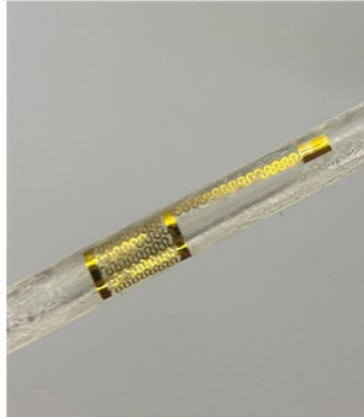

$\varnothing > 2.8 \text{ mm}$

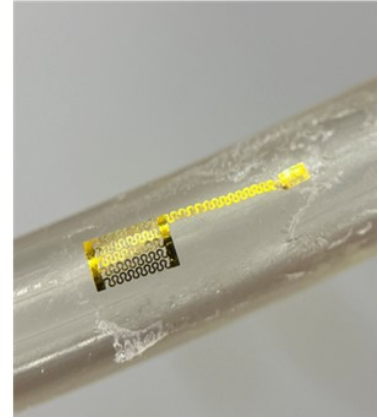

**Figure S11** Integration of the serpentine electrodes to a tubular-shaped platform with various diameters, starting from 2 mm to 5 mm. The 2.8 mm is selected as the benchmark diameter because it is the typical dimension of the EVD catheter, the basis of our current design.

## Pre-bending

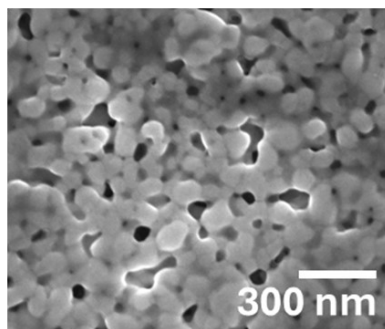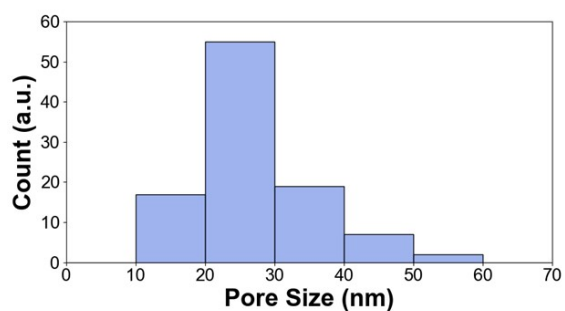

## Post bending

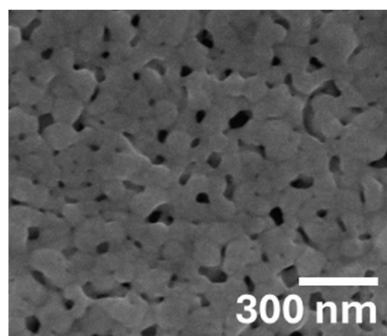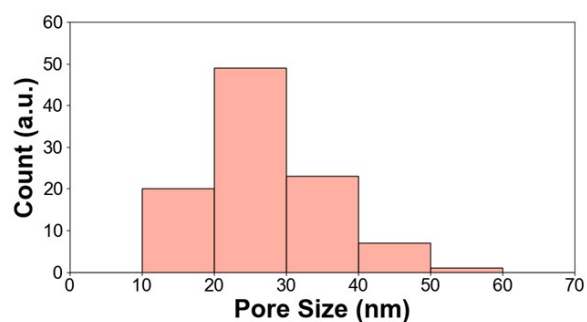

**Figure S12** SEM micrographs of mesoporous gold before (pre-bending) and after (post-bending) being subjected to repeated bending cycles (100 cycles). Followed by image analysis for pore size distribution of mesoporous gold.

**a) Insertion Speed Comparison (catheter only)**

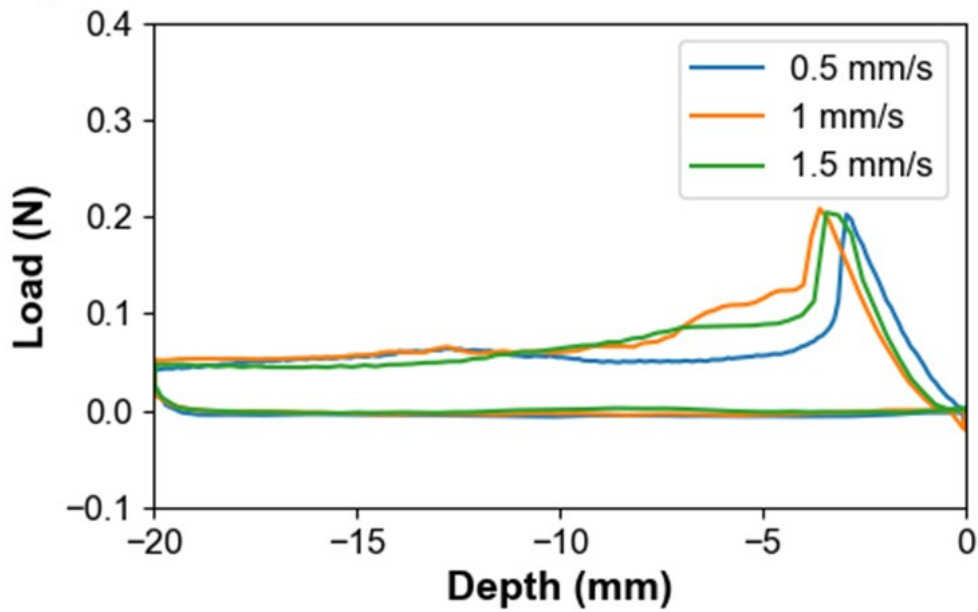

**b) Insertion Speed Comparison (integrated catheter)**

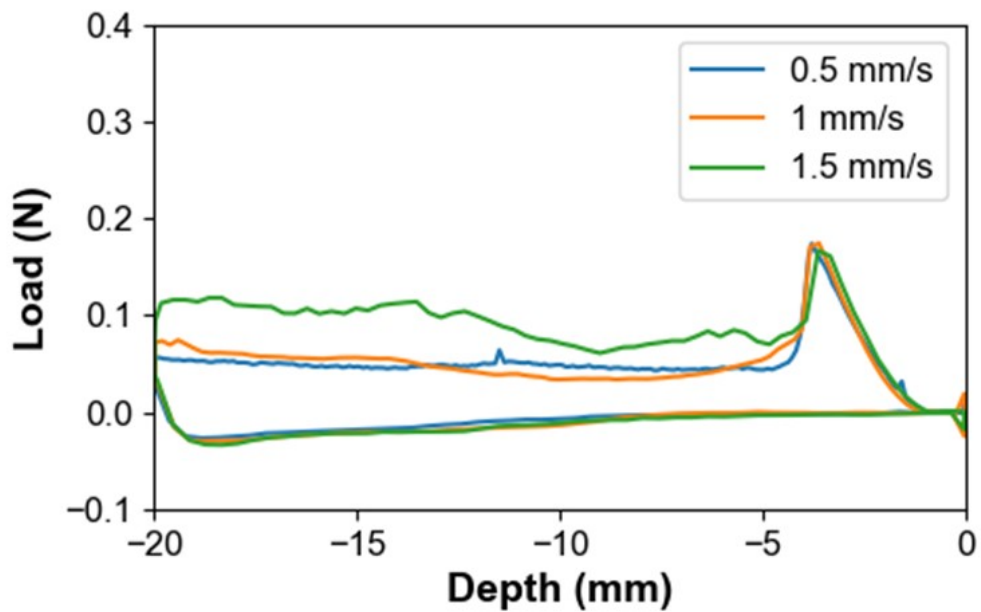

**Figure S13** Comparison of insertion force measurement on (a) plain catheter and (b) integrated catheter under different insertion rates

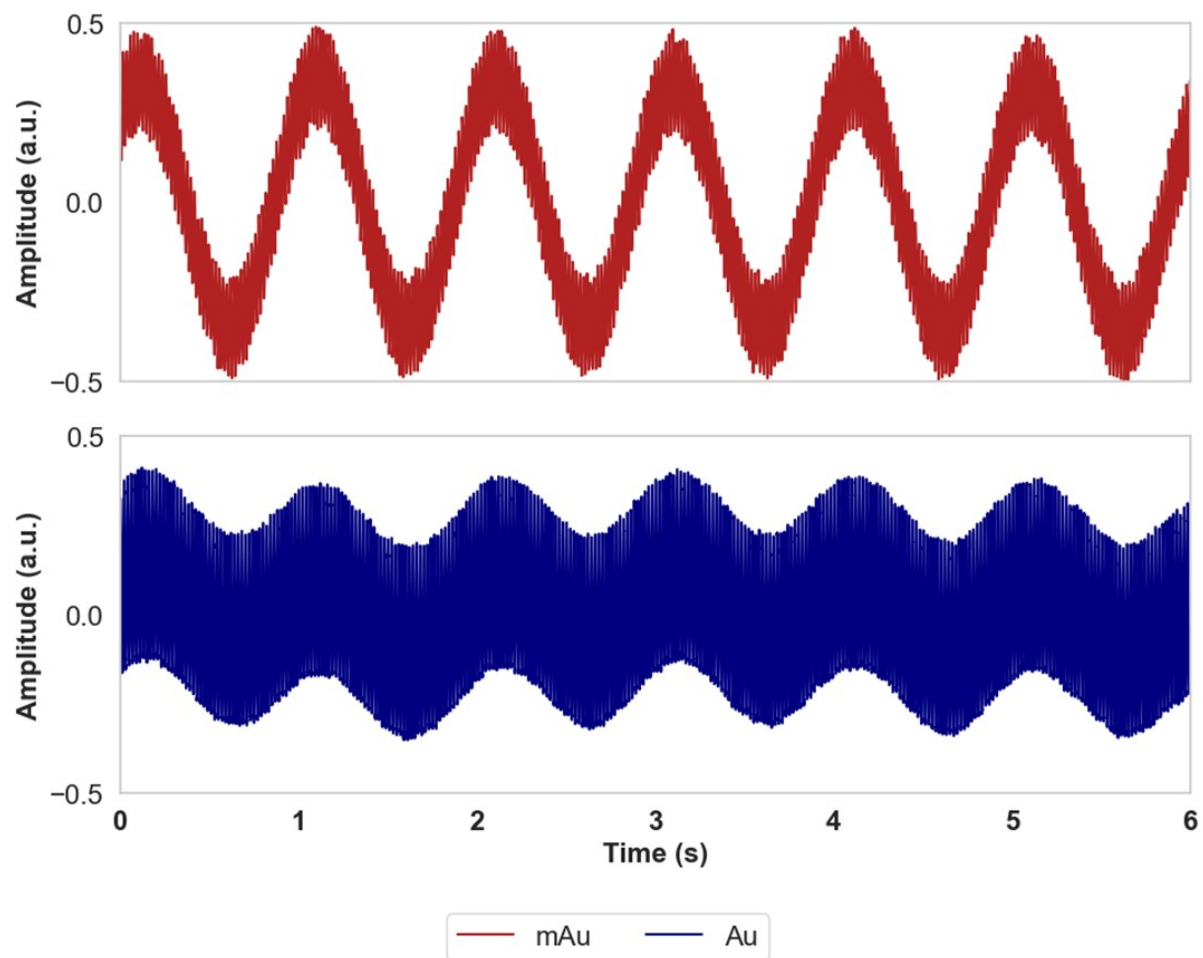

**Figure S14** Benchtop characterization comparison of electrode recording capabilities of artificial LFP recording at 1 Hz between mesoporous gold electrodes (top) and flat gold electrodes (bottom).

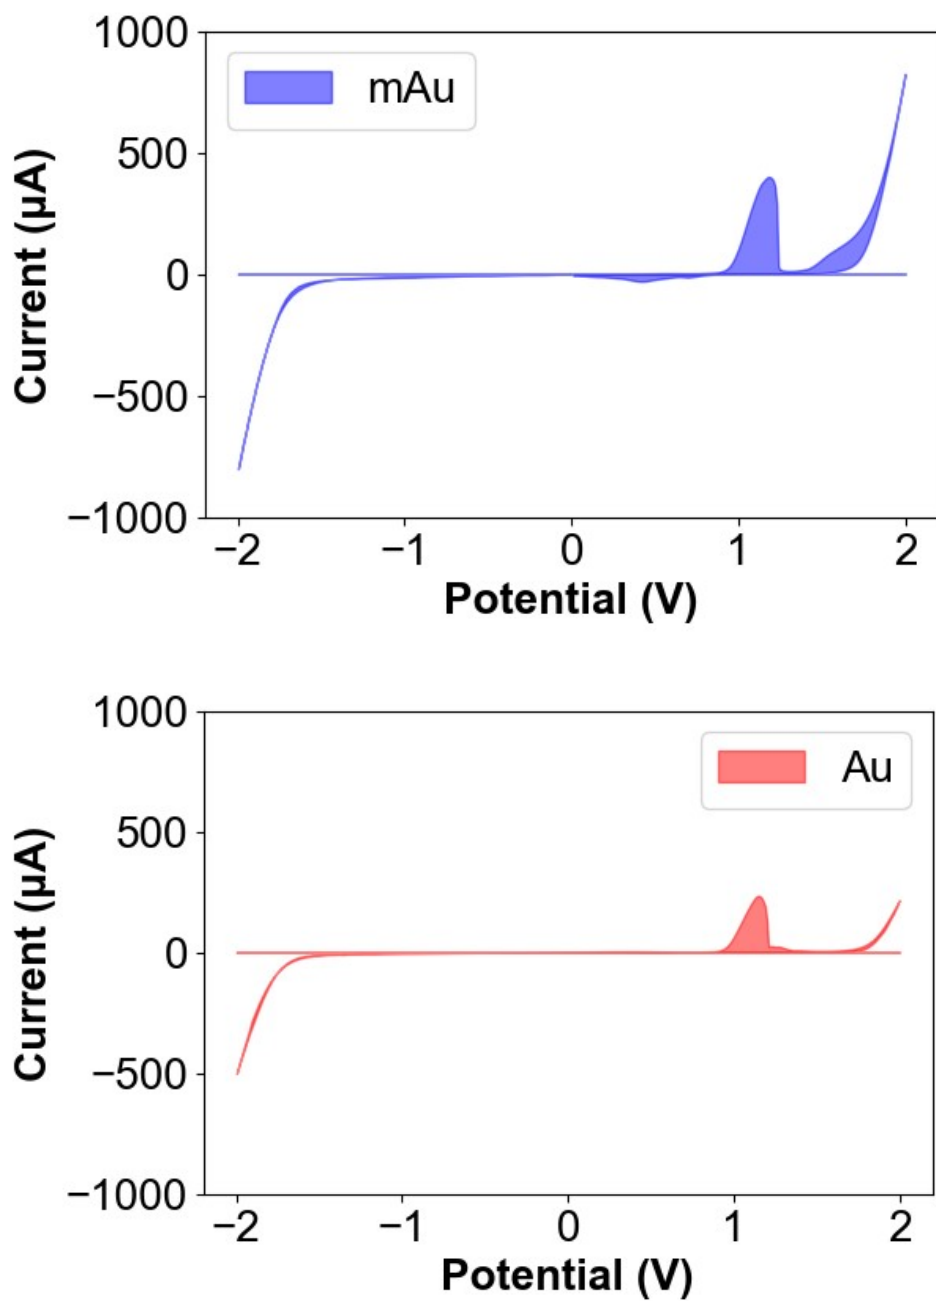

**Figure S15** Cyclic voltammetry results of mesoporous gold (top) and flat gold (bottom) in 1x PBS solution

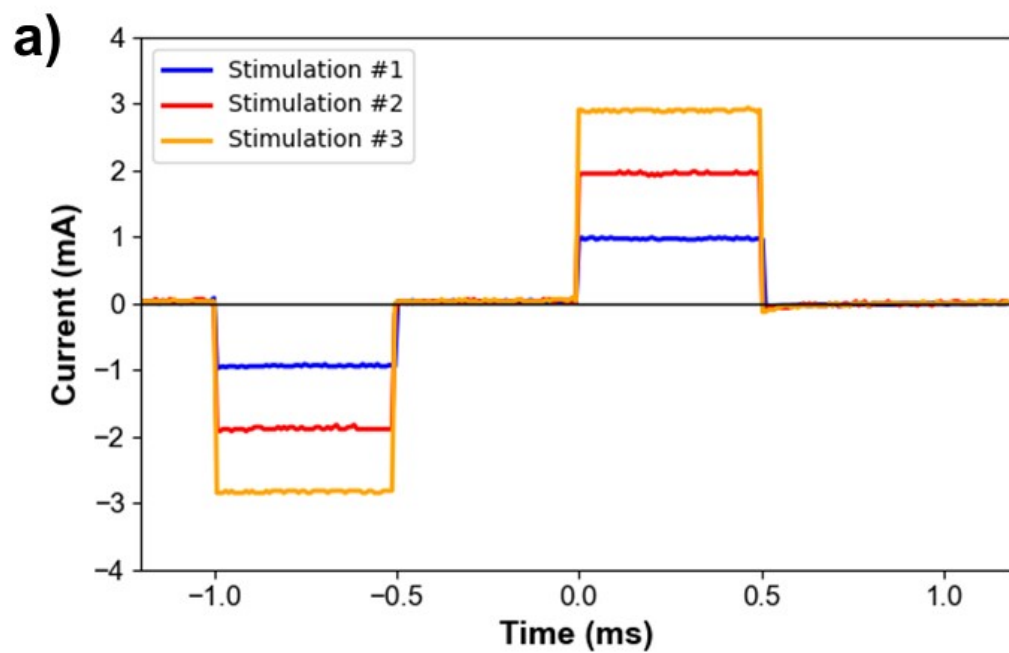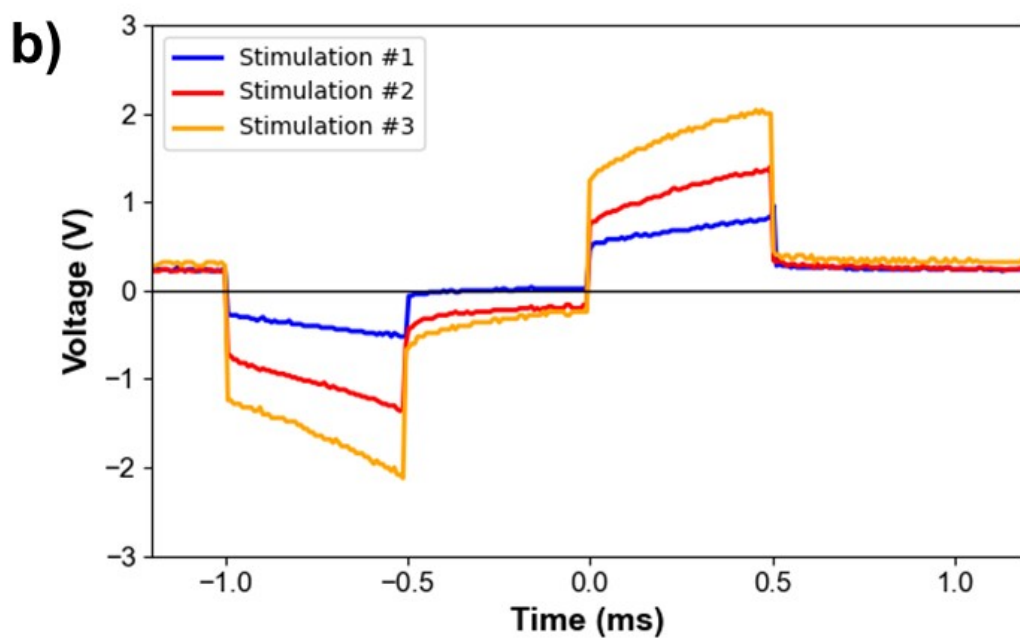

**Figure S16** (a) Biphasic stimulation magnitude for characterization of charge injection capacity (b) voltage transient of mesoporous gold electrodes under the corresponding stimulation magnitude.

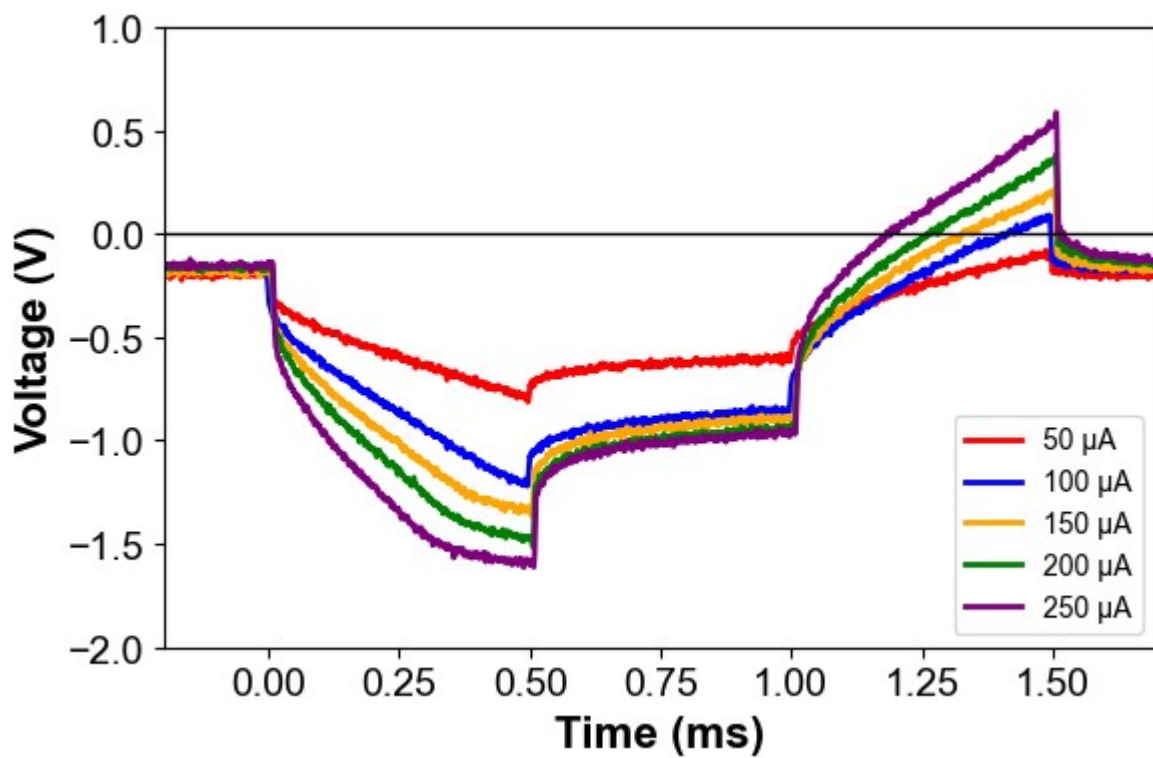

**Figure S17** Voltage transient of flat gold electrodes with various cathodic first biphasic stimulation parameters

**PI**

| Properties                | Unit               | Value    |
|---------------------------|--------------------|----------|
| Density                   | kg/mm <sup>3</sup> | 1.38E-06 |
| Isotropic Elasticity      |                    |          |
| Young's Modulus           | MPa                | 2478     |
| Poisson's Ratio           | -                  | 0.3986   |
| Bulk Modulus              | MPa                | 4073     |
| Shear Modulus             | MPa                | 885.89   |
| Ultimate Tensile Strength | MPa                | 92.43    |
| Tensile Yield Strength    | MPa                | 87.88    |

**Gold**

| Properties                | Unit               | Value    |
|---------------------------|--------------------|----------|
| Density                   | kg/mm <sup>3</sup> | 1.93E-05 |
| Isotropic Elasticity      |                    |          |
| Young's Modulus           | MPa                | 75760    |
| Poisson's Ratio           | -                  | 0.42     |
| Bulk Modulus              | MPa                | 1.58E+05 |
| Shear Modulus             | MPa                | 26676    |
| Ultimate Tensile Strength | MPa                | 199      |
| Tensile Yield Strength    | MPa                | 183.9    |

**Silicone**

| Properties                | Unit               | Value    |
|---------------------------|--------------------|----------|
| Density                   | kg/mm <sup>3</sup> | 2.33E-06 |
| Isotropic Elasticity      |                    |          |
| Young's Modulus           | MPa                | 1.63E+05 |
| Poisson's Ratio           | -                  | 0.27     |
| Bulk Modulus              | MPa                | 1.18E+05 |
| Shear Modulus             | MPa                | 64055    |
| Ultimate Tensile Strength | MPa                | 172.3    |
| Tensile Yield Strength    | MPa                | 172.3    |

**Table S1.** Material properties assigned on FEA analysis using ANSYS Workbench
